# Supplementary material for: The effect of Mg and Sr on the crystallinity of bones evaluated through Raman spectroscopy and laser ablation-ICPMS analysis
Source: Royal Society of Chemistry journal article supplement (doi:10.1039/c7an00734e), 2017-01-01
Supplement: c7an00734e1.pdf [file c7an00734e1.pdf]

## Y. Tanaka et al., 2017 (Table ESI-1)

**Table ESI-1** Resulting crystallinity and Mg/Ca and Sr/Ca molar ratios obtained from bone and serum samples

| Sample             | Endosteal lamellar         |                            |                                   |    | Intracortical non-lamellar |                            |                                   |     | Serum                 |                            |
|--------------------|----------------------------|----------------------------|-----------------------------------|----|----------------------------|----------------------------|-----------------------------------|-----|-----------------------|----------------------------|
|                    | Mg/Ca ( $\times 10^{-2}$ ) | Sr/Ca ( $\times 10^{-4}$ ) | Crystallinity( $\times 10^{-2}$ ) | N  | Mg/Ca ( $\times 10^{-2}$ ) | Sr/Ca ( $\times 10^{-4}$ ) | Crystallinity( $\times 10^{-2}$ ) | N   | Mg/Ca                 | Sr/Ca ( $\times 10^{-4}$ ) |
| Control            |                            |                            |                                   |    |                            |                            |                                   |     |                       |                            |
| Conorol-1          | 2.65 ± 0.09                | 2.16 ± 0.13                | 5.52 ± 0.14                       | 60 | 2.75 ± 0.15                | 2.44 ± 0.09                | 5.40 ± 0.10                       | 130 | 0.370 ± 0.006         | 1.49 ± 0.02                |
| Conorol-2          | 2.55 ± 0.21                | 2.09 ± 0.11                | 5.53 ± 0.14                       | 50 | 2.57 ± 0.14                | 2.53 ± 0.13                | 5.46 ± 0.11                       | 90  | 0.341 ± 0.007         | 1.69 ± 0.03                |
| Conorol-3          | 2.71 ± 0.15                | 2.27 ± 0.20                | 5.57 ± 0.15                       | 90 | 2.75 ± 0.21                | 2.67 ± 0.11                | 5.51 ± 0.11                       | 80  | 0.346 ± 0.006         | 1.55 ± 0.03                |
| Conorol-4          | 2.55 ± 0.10                | 1.98 ± 0.12                | 5.57 ± 0.11                       | 70 | 2.61 ± 0.14                | 2.41 ± 0.17                | 5.52 ± 0.10                       | 120 | 0.276 ± 0.007         | 1.46 ± 0.03                |
| Conorol-5          | 2.65 ± 0.16                | 2.28 ± 0.14                | 5.60 ± 0.16                       | 40 | 2.77 ± 0.16                | 2.89 ± 0.13                | 5.45 ± 0.10                       | 150 | 0.318 ± 0.005         | 1.46 ± 0.02                |
| Conorol-6          | 2.67 ± 0.07                | 2.74 ± 0.13                | 5.53 ± 0.10                       | 30 | 2.82 ± 0.15                | 3.08 ± 0.16                | 5.44 ± 0.10                       | 130 | 0.348 ± 0.008         | 1.44 ± 0.03                |
| Conorol-7          | 2.56 ± 0.10                | 1.96 ± 0.13                | 5.54 ± 0.14                       | 60 | 2.68 ± 0.13                | 2.45 ± 0.16                | 5.48 ± 0.09                       | 130 | 0.321 ± 0.008         | 1.22 ± 0.03                |
| <b>Mean (±1SD)</b> | <b>2.62 ± 0.06</b>         | <b>2.21 ± 0.27</b>         | <b>5.55 ± 0.03</b>                |    | <b>2.71 ± 0.09</b>         | <b>2.64 ± 0.26</b>         | <b>5.47 ± 0.04</b>                |     | <b>0.331 ± 0.030</b>  | <b>1.47 ± 0.14</b>         |
| CKD                |                            |                            |                                   |    |                            |                            |                                   |     |                       |                            |
| CKD-1              | 3.51 ± 0.14                | 2.83 ± 0.07                | 5.12 ± 0.16                       | 60 | 3.31 ± 0.24                | 2.87 ± 0.11                | 5.28 ± 0.13                       | 100 | 0.462 ± 0.008         | 1.81 ± 0.03                |
| CKD-2              | 3.79 ± 0.19                | 2.67 ± 0.07                | 5.25 ± 0.14                       | 60 | 3.27 ± 0.26                | 2.76 ± 0.13                | 5.35 ± 0.13                       | 90  | 0.424 ± 0.010         | 1.86 ± 0.04                |
| CKD-3              | 3.03 ± 0.18                | 2.62 ± 0.08                | 5.36 ± 0.14                       | 20 | 3.16 ± 0.19                | 2.91 ± 0.15                | 5.28 ± 0.15                       | 160 | 0.402 ± 0.006         | 1.88 ± 0.03                |
| CKD-4              | 3.12 ± 0.13                | 2.48 ± 0.19                | 5.41 ± 0.17                       | 50 | 2.99 ± 0.24                | 2.79 ± 0.10                | 5.35 ± 0.12                       | 120 | 0.360 ± 0.008         | 1.66 ± 0.04                |
| CKD-5              | 3.16 ± 0.14                | 2.96 ± 0.08                | 5.37 ± 0.12                       | 30 | 2.98 ± 0.20                | 2.99 ± 0.14                | 5.39 ± 0.11                       | 140 | 0.399 ± 0.006         | 2.04 ± 0.04                |
| CKD-6              | 3.62 ± 0.19                | 2.74 ± 0.09                | 5.15 ± 0.14                       | 50 | 3.05 ± 0.25                | 2.78 ± 0.08                | 5.32 ± 0.14                       | 60  | 0.593 ± 0.010         | 1.72 ± 0.03                |
| <b>Mean (±1SD)</b> | <b>3.37 ± 0.31*</b>        | <b>2.72 ± 0.17*</b>        | <b>5.28 ± 0.12*</b>               |    | <b>3.13 ± 0.14*</b>        | <b>2.85 ± 0.09</b>         | <b>5.33 ± 0.04*</b>               |     | <b>0.440 ± 0.082*</b> | <b>1.83 ± 0.13*</b>        |
| DM                 |                            |                            |                                   |    |                            |                            |                                   |     |                       |                            |
| DM-1               | 2.45 ± 0.08                | 1.94 ± 0.29                | 5.68 ± 0.08                       | 60 | 2.61 ± 0.13                | 2.39 ± 0.09                | 5.56 ± 0.10                       | 90  | 0.330 ± 0.007         | 1.37 ± 0.03                |
| DM-2               | 2.48 ± 0.08                | 1.67 ± 0.15                | 5.70 ± 0.12                       | 80 | 2.47 ± 0.18                | 2.37 ± 0.21                | 5.72 ± 0.10                       | 50  | 0.358 ± 0.007         | 1.20 ± 0.02                |
| DM-3               | 2.54 ± 0.11                | 2.12 ± 0.15                | 5.56 ± 0.08                       | 30 | 2.61 ± 0.19                | 2.81 ± 0.25                | 5.54 ± 0.08                       | 118 | 0.336 ± 0.007         | 1.28 ± 0.02                |
| DM-4               | 2.87 ± 0.13                | 1.97 ± 0.04                | 5.53 ± 0.14                       | 50 | 2.86 ± 0.14                | 2.10 ± 0.11                | 5.39 ± 0.11                       | 70  | 0.342 ± 0.006         | 1.14 ± 0.02                |
| DM-5               | 2.60 ± 0.11                | 1.85 ± 0.26                | 5.62 ± 0.11                       | 60 | 2.68 ± 0.10                | 2.66 ± 0.14                | 5.55 ± 0.09                       | 110 | 0.322 ± 0.007         | 1.35 ± 0.03                |
| DM-6               | 2.52 ± 0.10                | 1.68 ± 0.10                | 5.55 ± 0.16                       | 60 | 2.65 ± 0.16                | 2.43 ± 0.36                | 5.47 ± 0.09                       | 100 | 0.310 ± 0.005         | 1.04 ± 0.02                |
| DM-7               | NA‡                        | NA‡                        | NA‡                               |    | 2.66 ± 0.17                | 2.73 ± 0.11                | 5.59 ± 0.11                       | 110 | 0.425 ± 0.008         | 1.27 ± 0.03                |
| <b>Mean (±1SD)</b> | <b>2.58 ± 0.15</b>         | <b>1.87 ± 0.17*</b>        | <b>5.61 ± 0.07</b>                |    | <b>2.65 ± 0.11</b>         | <b>2.50 ± 0.25</b>         | <b>5.54 ± 0.10</b>                |     | <b>0.346 ± 0.038</b>  | <b>1.24 ± 0.12*</b>        |

Uncertainties for the crystallinity and elemental ratio for bones were defined as  $1\sigma$  calculated from multiple analysis spots.

Uncertainties for the Mg/Ca and Sr/Ca ratios in serum samples were defined as  $1\sigma_m$  calculated from repeated measurements with time-resolved-analysis.

‡ No lamellar bone could be found in the endosteal area

\* Steel's non-parametric rank sum test against control: the data of  $p < 0.05$  were significantly different from control.
